# Supplementary material for: Acute mental health responses during the COVID-19 pandemic in Australia
Source: PLOS journal article supplement (doi:10.1371/journal.pone.0236562), 2020-07-28

# PLOS ONE

## Acute mental health responses during the COVID-19 pandemic in Australia

--Manuscript Draft--

|                                                                                                                                                                  |                                                                                                                                                                                                                                                                                                                                                                                                                                                                                                                                                                                                                                                                                                                                                                                                                                                                                                                                                                                                                                                                                                                                                                                                                                                                                                                                                                                                                                                                                                                                                                                                                                                                                                                                                                                                                                                                                                                                                                                                                                                                                                                                                                                                                                                                                                                                                                                              |
|------------------------------------------------------------------------------------------------------------------------------------------------------------------|----------------------------------------------------------------------------------------------------------------------------------------------------------------------------------------------------------------------------------------------------------------------------------------------------------------------------------------------------------------------------------------------------------------------------------------------------------------------------------------------------------------------------------------------------------------------------------------------------------------------------------------------------------------------------------------------------------------------------------------------------------------------------------------------------------------------------------------------------------------------------------------------------------------------------------------------------------------------------------------------------------------------------------------------------------------------------------------------------------------------------------------------------------------------------------------------------------------------------------------------------------------------------------------------------------------------------------------------------------------------------------------------------------------------------------------------------------------------------------------------------------------------------------------------------------------------------------------------------------------------------------------------------------------------------------------------------------------------------------------------------------------------------------------------------------------------------------------------------------------------------------------------------------------------------------------------------------------------------------------------------------------------------------------------------------------------------------------------------------------------------------------------------------------------------------------------------------------------------------------------------------------------------------------------------------------------------------------------------------------------------------------------|
| <b>Manuscript Number:</b>                                                                                                                                        | PONE-D-20-12728                                                                                                                                                                                                                                                                                                                                                                                                                                                                                                                                                                                                                                                                                                                                                                                                                                                                                                                                                                                                                                                                                                                                                                                                                                                                                                                                                                                                                                                                                                                                                                                                                                                                                                                                                                                                                                                                                                                                                                                                                                                                                                                                                                                                                                                                                                                                                                              |
| <b>Article Type:</b>                                                                                                                                             | Research Article                                                                                                                                                                                                                                                                                                                                                                                                                                                                                                                                                                                                                                                                                                                                                                                                                                                                                                                                                                                                                                                                                                                                                                                                                                                                                                                                                                                                                                                                                                                                                                                                                                                                                                                                                                                                                                                                                                                                                                                                                                                                                                                                                                                                                                                                                                                                                                             |
| <b>Full Title:</b>                                                                                                                                               | Acute mental health responses during the COVID-19 pandemic in Australia                                                                                                                                                                                                                                                                                                                                                                                                                                                                                                                                                                                                                                                                                                                                                                                                                                                                                                                                                                                                                                                                                                                                                                                                                                                                                                                                                                                                                                                                                                                                                                                                                                                                                                                                                                                                                                                                                                                                                                                                                                                                                                                                                                                                                                                                                                                      |
| <b>Short Title:</b>                                                                                                                                              | Acute mental health responses during the COVID-19 pandemic in Australia                                                                                                                                                                                                                                                                                                                                                                                                                                                                                                                                                                                                                                                                                                                                                                                                                                                                                                                                                                                                                                                                                                                                                                                                                                                                                                                                                                                                                                                                                                                                                                                                                                                                                                                                                                                                                                                                                                                                                                                                                                                                                                                                                                                                                                                                                                                      |
| <b>Corresponding Author:</b>                                                                                                                                     | Samantha Tang<br>University of New South Wales<br>Randwick, NSW AUSTRALIA                                                                                                                                                                                                                                                                                                                                                                                                                                                                                                                                                                                                                                                                                                                                                                                                                                                                                                                                                                                                                                                                                                                                                                                                                                                                                                                                                                                                                                                                                                                                                                                                                                                                                                                                                                                                                                                                                                                                                                                                                                                                                                                                                                                                                                                                                                                    |
| <b>Keywords:</b>                                                                                                                                                 | COVID-19; mental health; psychological distress; cross-sectional study; online survey; Australian population                                                                                                                                                                                                                                                                                                                                                                                                                                                                                                                                                                                                                                                                                                                                                                                                                                                                                                                                                                                                                                                                                                                                                                                                                                                                                                                                                                                                                                                                                                                                                                                                                                                                                                                                                                                                                                                                                                                                                                                                                                                                                                                                                                                                                                                                                 |
| <b>Abstract:</b>                                                                                                                                                 | <p>The acute and long-term mental health impacts of the COVID-19 pandemic are unknown. The current study examined the acute mental health responses to the COVID-19 pandemic in 5070 adult participants in Australia, using an online survey administered during the peak of the outbreak in Australia (27<sup>th</sup> March to 7<sup>th</sup> April 2020). Self-report questionnaires examined COVID-19 fears and behavioural responses to COVID-19, as well as the severity of psychological distress (depression, anxiety and stress), health anxiety, contamination fears, alcohol use, and physical activity. 78% of respondents reported that their mental health had worsened since the outbreak, one quarter (25.9%) were very or extremely worried about contracting COVID-19, and half (52.7%) were worried about family and friends contracting COVID-19. Uncertainty, loneliness and financial worries (50%) were common. Rates of elevated psychological distress were higher than expected, with 62%, 50%, and 64% of respondents reporting elevated depression, anxiety and stress levels respectively, and one in four reporting elevated health anxiety in the past week. Participants with self-reported history of a mental health diagnosis had significantly higher distress, health anxiety, and COVID-19 fears than those without a prior mental health diagnosis. Demographic (e.g., non-binary or different gender identity; Aboriginal and Torres Strait Islander status), occupational (e.g., being a carer or stay at home parent), and psychological (e.g., perceived risk of contracting COVID-19) factors were associated with distress. Results revealed that precautionary behaviours (e.g., washing hands, using hand sanitiser, avoiding social events) were common, although in contrast to previous research, higher engagement in hygiene behaviours was associated with higher stress and anxiety levels. These results highlight the serious acute impact of COVID-19 on the mental health of respondents, and the need for proactive, accessible digital mental health services to address these mental health needs, particularly for those most vulnerable, including people with prior history of mental health problems. Longitudinal research is needed to explore long-term predictors of poor mental health from the COVID-19 pandemic.</p> |
| <b>Order of Authors:</b>                                                                                                                                         | Jill Maree Newby<br>Kathleen O'Moore<br>Samantha Tang<br>Helen Christensen<br>Kate Faasse                                                                                                                                                                                                                                                                                                                                                                                                                                                                                                                                                                                                                                                                                                                                                                                                                                                                                                                                                                                                                                                                                                                                                                                                                                                                                                                                                                                                                                                                                                                                                                                                                                                                                                                                                                                                                                                                                                                                                                                                                                                                                                                                                                                                                                                                                                    |
| <b>Additional Information:</b>                                                                                                                                   |                                                                                                                                                                                                                                                                                                                                                                                                                                                                                                                                                                                                                                                                                                                                                                                                                                                                                                                                                                                                                                                                                                                                                                                                                                                                                                                                                                                                                                                                                                                                                                                                                                                                                                                                                                                                                                                                                                                                                                                                                                                                                                                                                                                                                                                                                                                                                                                              |
| <b>Question</b>                                                                                                                                                  | <b>Response</b>                                                                                                                                                                                                                                                                                                                                                                                                                                                                                                                                                                                                                                                                                                                                                                                                                                                                                                                                                                                                                                                                                                                                                                                                                                                                                                                                                                                                                                                                                                                                                                                                                                                                                                                                                                                                                                                                                                                                                                                                                                                                                                                                                                                                                                                                                                                                                                              |
| <b>Financial Disclosure</b><br><br>Enter a financial disclosure statement that describes the sources of funding for the work included in this submission. Review | This study was funded by a MRFF Career Development Fellowship to JMN. The funders had no role in study design, data collection and analysis, decision to publish, or preparation of the manuscript.                                                                                                                                                                                                                                                                                                                                                                                                                                                                                                                                                                                                                                                                                                                                                                                                                                                                                                                                                                                                                                                                                                                                                                                                                                                                                                                                                                                                                                                                                                                                                                                                                                                                                                                                                                                                                                                                                                                                                                                                                                                                                                                                                                                          |

the [submission guidelines](#) for detailed requirements. View published research articles from [PLOS ONE](#) for specific examples.

This statement is required for submission and **will appear in the published article** if the submission is accepted. Please make sure it is accurate.

#### Unfunded studies

Enter: *The author(s) received no specific funding for this work.*

#### Funded studies

Enter a statement with the following details:

- Initials of the authors who received each award
- Grant numbers awarded to each author
- The full name of each funder
- URL of each funder website
- Did the sponsors or funders play any role in the study design, data collection and analysis, decision to publish, or preparation of the manuscript?
- **NO** - Include this sentence at the end of your statement: *The funders had no role in study design, data collection and analysis, decision to publish, or preparation of the manuscript.*
- **YES** - Specify the role(s) played.

\* typeset

#### Competing Interests

Use the instructions below to enter a competing interest statement for this submission. On behalf of all authors, disclose any [competing interests](#) that could be perceived to bias this work—acknowledging all financial support and any other relevant financial or non-financial competing interests.

This statement **will appear in the published article** if the submission is accepted. Please make sure it is accurate. View published research articles from [PLOS ONE](#) for specific examples.

The authors have declared that no competing interests exist.

### NO authors have competing interests

Enter: *The authors have declared that no competing interests exist.*

### Authors with competing interests

Enter competing interest details beginning with this statement:

*I have read the journal's policy and the authors of this manuscript have the following competing interests: [insert competing interests here]*

\* typeset

### Ethics Statement

Enter an ethics statement for this submission. This statement is required if the study involved:

- Human participants
- Human specimens or tissue
- Vertebrate animals or cephalopods
- Vertebrate embryos or tissues
- Field research

Write "N/A" if the submission does not require an ethics statement.

General guidance is provided below.

Consult the [submission guidelines](#) for detailed instructions. **Make sure that all information entered here is included in the Methods section of the manuscript.**

The study was approved by the UNSW Human Research Ethics Advisory Panel and the UNSW Human Research Ethics Committee (approval number 3330). All respondents provided electronic informed consent before participating.

**Format for specific study types**

**Human Subject Research (involving human participants and/or tissue)**

- Give the name of the institutional review board or ethics committee that approved the study
- Include the approval number and/or a statement indicating approval of this research
- Indicate the form of consent obtained (written/oral) or the reason that consent was not obtained (e.g. the data were analyzed anonymously)

**Animal Research (involving vertebrate animals, embryos or tissues)**

- Provide the name of the Institutional Animal Care and Use Committee (IACUC) or other relevant ethics board that reviewed the study protocol, and indicate whether they approved this research or granted a formal waiver of ethical approval
- Include an approval number if one was obtained
- If the study involved *non-human primates*, add *additional details* about animal welfare and steps taken to ameliorate suffering
- If anesthesia, euthanasia, or any kind of animal sacrifice is part of the study, include briefly which substances and/or methods were applied

**Field Research**

Include the following details if this study involves the collection of plant, animal, or other materials from a natural setting:

- Field permit number
- Name of the institution or relevant body that granted permission

**Data Availability**

Authors are required to make all data underlying the findings described fully available, without restriction, and from the time of publication. PLOS allows rare exceptions to address legal and ethical concerns. See the [PLOS Data Policy](#) and [FAQ](#) for detailed information.

No - some restrictions will apply

A Data Availability Statement describing where the data can be found is required at submission. Your answers to this question constitute the Data Availability Statement and **will be published in the article**, if accepted.

**Important:** Stating 'data available on request from the author' is not sufficient. If your data are only available upon request, select 'No' for the first question and explain your exceptional situation in the text box.

Do the authors confirm that all data underlying the findings described in their manuscript are fully available without restriction?

**Describe where the data may be found in full sentences. If you are copying our sample text, replace any instances of XXX with the appropriate details.**

- If the data are **held or will be held in a public repository**, include URLs, accession numbers or DOIs. If this information will only be available after acceptance, indicate this by ticking the box below. For example: *All XXX files are available from the XXX database (accession number(s) XXX, XXX).*
- If the data are all contained **within the manuscript and/or Supporting Information files**, enter the following: *All relevant data are within the manuscript and its Supporting Information files.*
- If neither of these applies but you are able to provide **details of access elsewhere**, with or without limitations, please do so. For example:

*Data cannot be shared publicly because of [XXX]. Data are available from the XXX Institutional Data Access / Ethics Committee (contact via XXX) for researchers who meet the criteria for access to confidential data.*

*The data underlying the results presented in the study are available from (include the name of the third party*

Data will be available on request from the author as we do not have consent for the data to be made available in a public repository.

*and contact information or URL).*

- This text is appropriate if the data are owned by a third party and authors do not have permission to share the data.

\* typeset

Additional data availability information:

1

2

3

4

## 5 **Acute mental health responses during the COVID-19 pandemic in Australia**

6

7 Authors:

8 Jill M. Newby<sup>1,2</sup>, Kathleen O'Moore<sup>2</sup>, Samantha Tang<sup>2</sup>, Helen Christensen<sup>2</sup>, & Kate Faasse<sup>1</sup>9 <sup>1</sup>School of Psychology, UNSW Sydney, NSW, Australia10 <sup>2</sup>Black Dog Institute, UNSW Sydney, NSW, Australia

11

12

13 Corresponding author:

14 Jill M Newby

15 Black Dog Institute

16 UNSW Sydney

17 E: j.newby@unsw.edu.au

## Abstract

The acute and long-term mental health impacts of the COVID-19 pandemic are unknown. The current study examined the acute mental health responses to the COVID-19 pandemic in 5070 adult participants in Australia, using an online survey administered during the peak of the outbreak in Australia (27<sup>th</sup> March to 7<sup>th</sup> April 2020). Self-report questionnaires examined COVID-19 fears and behavioural responses to COVID-19, as well as the severity of psychological distress (depression, anxiety and stress), health anxiety, contamination fears, alcohol use, and physical activity. 78% of respondents reported that their mental health had worsened since the outbreak, one quarter (25.9%) were very or extremely worried about contracting COVID-19, and half (52.7%) were worried about family and friends contracting COVID-19. Uncertainty, loneliness and financial worries (50%) were common. Rates of elevated psychological distress were higher than expected, with 62%, 50%, and 64% of respondents reporting elevated depression, anxiety and stress levels respectively, and one in four reporting elevated health anxiety in the past week. Participants with self-reported history of a mental health diagnosis had significantly higher distress, health anxiety, and COVID-19 fears than those without a prior mental health diagnosis. Demographic (e.g., non-binary or different gender identity; Aboriginal and Torres Strait Islander status), occupational (e.g., being a carer or stay at home parent), and psychological (e.g., perceived risk of contracting COVID-19) factors were associated with distress. Results revealed that precautionary behaviours (e.g., washing hands, using hand sanitiser, avoiding social events) were common, although in contrast to previous research, higher engagement in hygiene behaviours was associated with higher stress and anxiety levels. These results highlight the serious acute impact of COVID-19 on the mental health of respondents, and the need for proactive, accessible digital mental health services to address these mental health needs, particularly for those most vulnerable, including people with prior history of mental health problems. Longitudinal research is needed to explore long-term predictors of poor mental health from the COVID-19 pandemic.



42 The novel Coronavirus (COVID-19) first emerged in Wuhan, China in December 2019, and has  
43 since evolved into a global pandemic. As of April 27<sup>th</sup> 2020, there are more than 2.87 million confirmed  
44 cases and 198,668 deaths globally with 6,720 confirmed cases, and 83 deaths from COVID-19 in Australia  
45 (1). The COVID-19 pandemic has caused unprecedented disruption to the way most people live, work,  
46 study, socialise, and access health care; with widespread travel bans, border closures, lockdowns, social  
47 distancing, isolation and quarantine measures enforced by many countries. These changes and their  
48 ramifications (e.g., unemployment, social isolation), along with fears of COVID-19 are likely to have  
49 significant and long-term impacts on the mental health of the community. Research into past pandemics,  
50 such as the 2003 outbreak of Severe Acute Respiratory Syndrome (SARS), has shown higher rates of illness  
51 fears, psychological distress (e.g., depression, anxiety, stress), insomnia and other mental health problems  
52 (e.g., posttraumatic stress) in people with pre-existing mental illness, front-line health care workers (2), and  
53 survivors of severe and life-threatening cases of the disease (3-6).

54 High quality research into the mental health impacts of COVID-19 is urgently needed (7) to inform  
55 evidence-based policy decisions, prevention efforts, treatment programs and community support systems,  
56 particularly for those who are most vulnerable and those who are at risk of experiencing poor mental health  
57 outcomes during and after this pandemic. In marked contrast to the rapidly growing literature into the  
58 physical health consequences of COVID-19, there is currently limited information about the mental health  
59 impacts of the COVID-19 outbreak in the general population. However, some recent research has emerged  
60 from China with community participants (8-10), and health care worker samples (11). In a cross-sectional  
61 survey of 52,730 participants in China conducted between the 31<sup>st</sup> January to the 10<sup>th</sup> February 2020 (10),  
62 29.3% of respondents experienced mild to moderate psychological distress, and 5.1% experienced severe  
63 distress. In another survey of 1210 members of the general public (half of whom were students) conducted  
64 between 31<sup>st</sup> January to 2<sup>nd</sup> February 2020, Wang et al. (8) found that over half (53.8%) of participants rated  
65 the psychological impact of the COVID-19 outbreak as moderate to severe, three quarters were worried  
66 about their family members contracting COVID-19, and rates of moderate to severe depression, anxiety and  
67 stress were 16.5%, 28.8%, and 8.1% respectively. In a follow-up survey four weeks later, rates of  
68 depression, anxiety and stress remained unchanged (12). In another survey of 7236 self-selected volunteers

69 from 3<sup>rd</sup> to 17<sup>th</sup> February 2020, Huang & Zhao (13) found that 20.1%, 35.1%, and 18.2% of respondents  
70 reported symptoms of depression, generalised anxiety disorder (GAD), and insomnia on self-report  
71 measures.

72 Together these studies demonstrate the elevated psychological distress in the general community  
73 during the initial COVID-19 outbreak in China. These studies also give some early insights into factors that  
74 may increase a person's vulnerability to experiencing poor mental health during the pandemic. Preliminary  
75 evidence suggests that i) demographic factors (younger participants, females, college students, and those  
76 with low educational attainment), ii) occupational factors (migrant workers, nurses), iii) health-related  
77 factors (history of chronic illness, poor self-rated health (8)), and iv) greater exposure to COVID-19 and the  
78 worst affected regions of the outbreak (10), are associated with higher distress levels. In contrast, engaging  
79 in precautionary behaviours (e.g., hand hygiene, wearing a mask) have been associated with lower distress  
80 (8, 12). As COVID-19 has spread to communities outside of China, more research is urgently needed to  
81 explore the mental health impacts of the outbreak, and to identify groups who are vulnerable to poorer  
82 mental health in other countries.

83 To our knowledge there are no published findings on the mental health of the general community  
84 during the COVID-19 pandemic in Australia. However, we conducted a previous online survey of the  
85 knowledge, attitudes, behaviours and risk perceptions of 2174 people from the general community, shortly  
86 after the first death occurred from COVID-19 and when confirmed COVID-19 cases were low in Australia  
87 (March 2<sup>nd</sup> -9<sup>th</sup> 2020) (14). In that study, we found one in three participants were very or extremely  
88 concerned about an outbreak, and that participants perceived their risk of personally contracting COVID-19  
89 as relatively high (rated as 70% likelihood of contracting the virus). Moreover, most participants (61%)  
90 expected that they would experience moderate to severe symptoms of COVID-19 if they contracted the  
91 virus. We did not measure mental health outcomes, or how afraid individuals were of personally contracting  
92 COVID-19. Therefore, the current study extended our previous survey and investigated the mental health of  
93 Australian residents during a 12-day period from 27<sup>th</sup> March to 7<sup>th</sup> April 2020, which is now considered to  
94 be the time of the peak in new cases, and the steady decline in new cases. Three days prior to recruitment, an  
95 international travel ban had been implemented in Australia, and from 28<sup>th</sup> March 2020, all travellers arriving

96 in Australia from overseas were required to undergo a mandatory 14-day quarantine in designated  
97 accommodation. On the first day (27<sup>th</sup> March) of the study recruitment period, there was a total of 3378  
98 confirmed cases and 13 deaths related to COVID-19 in Australia, with 328 new cases diagnosed on the 27<sup>th</sup>  
99 March. Over the next two days, there was an increase of 785 new cases in Australia. Finally, over the  
100 remaining days of the study, the number of daily new cases steadily declined, with 93 new cases reported on  
101 the last day of recruitment (7<sup>th</sup> April 2020). There was a total of 5988 confirmed cases (including 3392  
102 active cases) and 49 deaths at the end of the survey period.

103 Drawing from past research (8, 10, 12) we assessed demographic characteristics, fears of COVID-19,  
104 risk perceptions and behavioural responses to the outbreak, psychological distress (depression, anxiety,  
105 stress), and alcohol use. We included measures of health anxiety and contamination fears due to their  
106 potential role in influencing behaviour, health service use, and anxious reactions to viral outbreaks (15-18),  
107 as well as physical activity levels, and loneliness, due to the expected negative impacts of social distancing  
108 measures on these variables, and due to their important role in mental and physical health (19, 20). Finally,  
109 we assessed financial worries, as we expected unemployment, and financial insecurity, which have already  
110 resulted from this outbreak, to have significant, negative impacts on mental health (7, 21). Our primary aim  
111 was to provide the first snapshot of the mental health of the general community during the initial COVID-19  
112 outbreak (and enforcement of social distancing laws) in Australia. The second aim was to explore the  
113 relationship between specific demographic and sample characteristics with depression, anxiety and stress, to  
114 identify factors that are associated with increased vulnerability for poorer mental health during the COVID-  
115 19 pandemic. While we acknowledge that the data from an online survey may not be representative of the  
116 entire population, they provide an important opportunity to (i) identify vulnerable groups who are risk of  
117 poorer mental health during COVID-19, (ii) determine the socio-demographic and psychological factors that  
118 predict psychological distress, and (iii) examine whether the findings from past pandemics, and from China,  
119 apply to the Australian context during the COVID-19 pandemic. Based on research from past pandemics,  
120 and Chinese research, we expected that between 20-35% would worry about contracting COVID-19 and  
121 experience elevated psychological distress, and that specific demographic variables including younger age,  
122 being a student, unemployed, female, or with lower educational attainment would predict higher distress

123 levels in the current cohort. We also expected people with lived experience of prior mental health diagnoses  
124 would have higher rates of distress and would be vulnerable to poorer mental health during the current  
125 pandemic. Finally, we predicted that engaging in precautionary hygiene behaviours would be associated  
126 with lower distress.

## 127 **Methods**

### 128 **Recruitment**

129 Participants were recruited for the online survey via social media posts, with Facebook  
130 advertisements targeting all users with i) current country of residence as Australia, and ii) age listed as 18 or  
131 above. Data was collected for 12 days from Friday 27<sup>th</sup> March to April 7<sup>th</sup>, 2020. The survey was  
132 administered via the Qualtrics survey platform. Each response came from a unique IP address to minimise  
133 duplicate entries.

### 134 **Ethics approval and consent**

135 The study was approved by the UNSW Human Research Ethics Advisory Panel and the UNSW  
136 Human Research Ethics Committee (approval number 3330). All respondents provided electronic informed  
137 consent before participating.

### 138 **Participants**

139 In total, 5,971 people viewed the participant information page and consent form. Of these, 579 did  
140 not complete the consent form, and a further 323 completed only some of the survey questions before  
141 discontinuing. This resulted in a final sample of 5071 participants with sufficient data (>70% complete) to  
142 include in the analysis. The structured questionnaire took approximately 15 minutes to complete.

### 143 **Measures**

#### 144 *Demographics*

145 Information was collected on participants' age group, gender, ethnicity, Aboriginal and Torres Strait  
146 Islander status, their highest level of education, carer status (for children, and/or someone with a disability,  
147 illness or frail aged) and state of residence within Australia. We also assessed participants' employment

148 status (including whether they had recently lost their job due to COVID-19), the industry of their main job,  
149 and the frequency at which they had worked from home during the past week (*not at all, a little, sometimes,*  
150 *most of the time, all of the time*).

### 151 ***General Health and Mental Health***

152 Participants were asked whether they had a chronic illness (*Yes, No, Unsure, Prefer not to say*), and  
153 completed a single-item measure assessing their *self-rated health* (Idler & Benyamini, 1997), with responses  
154 on a 5-point scale from *Poor* to *Excellent*. Participants were asked whether they had ever been diagnosed  
155 with a mental health problem such as depression and anxiety (*Yes, No, Unsure, Prefer not to say*), and  
156 whether they were currently receiving treatment for a mental health problem including medications,  
157 counselling, or psychological therapy (*Yes, No, Unsure, Prefer not to say*).

### 158 ***Mental Health***

159 Participants were asked to complete single item measures of i) how lonely they were feeling, ii) how  
160 worried they were about their financial situation, and iii) how uncertain they were feeling about the future,  
161 on a 5-point scale (*not at all, a little, moderately, very, extremely*). They were then asked to rate how the  
162 COVID-19 outbreak had impacted their mental health. “*Since the COVID-19 outbreak, my mental health*  
163 *has been...*”, and choose between 5 response options: *A lot worse, A little worse, Stayed the same, A little*  
164 *better, A lot better*.

165 The survey included several validated self-report screening instruments including i) the 21-item  
166 Depression Anxiety Stress Scales (22), a validated measure of depression, anxiety and stress symptoms, ii)  
167 the Whiteley-6 (23) a brief validated measure of health anxiety severity, iii) the Contamination Obsessions  
168 and Washing Compulsions subscale of the revised version of Padua Inventory of Obsessions and  
169 Compulsion (24), and iv) a specific measure of behavioural responses to the pandemic based on our prior  
170 study (14), and past research investigating behavioural responses to pandemics (25, 26). Finally, we assessed  
171 physical activity levels using the Physical Activity Vital Sign (27) which assessed i) the number of days in  
172 the past week they engaged in moderate to strenuous activity, and ii) the average number of minutes they  
173 exercised at this level, and screened for hazardous alcohol use using the Modified Alcohol Use Disorders

174 Identification Test (AUDIT-C; 28). All questionnaire responses were anchored to the past week, except for  
175 the AUDIT-C (past month), and the Padua contamination subscale (general). The mental health and lifestyle  
176 questionnaires were administered in randomised in order to minimise responding biases.

### 177 ***COVID-19 Variables, Fears and Perceived Risk***

178 Participants were asked about their own COVID-19 status (*I have caught COVID-19 in the past and*  
179 *am now recovered, I currently have COVID-19 [confirmed with a diagnostic test], I suspect I have COVID-*  
180 *19, I do not have COVID-19 and have not experienced it, Unsure, or Other (open text)*). They also indicated  
181 whether they were in self isolation (*Yes – I am in voluntary self-isolation, Yes – I am in forced self-isolation,*  
182 *No*). Participants were also asked i) whether any of their family or friends had contracted COVID-19 (*Yes,*  
183 *No, Unsure*), and ii) how concerned or worried they were that their friends or family members would  
184 contract COVID-19 (*not at all, a little concerned, moderately concerned, very concerned, extremely*  
185 *concerned*).

186 Participants were asked five questions relating to their perceived risk from, and worry about,  
187 COVID-19. The first question assessed how concerned or worried respondents were about catching COVID-  
188 19 on a 5-point scale (*not at all concerned, a little concerned, moderately concerned, very concerned,*  
189 *extremely concerned*). They then rated how likely they thought it was that they would catch the virus on a  
190 visual analogue scale (VAS) from 0 (*not at all likely*) to 100 (*extremely likely*). They were asked how much  
191 they thought they could do personally to protect themselves from catching the virus (perceived behavioural  
192 control), on a 0 (*couldn't do anything*) to 100 (*could do a lot*) visual analogue scale. Perceived illness  
193 severity was assessed by asking respondents how severe they thought their symptoms would be if they did  
194 catch COVID-19 (response options were: *no symptoms, mild symptoms, moderate symptoms, severe*  
195 *symptoms, severe symptoms requiring hospitalisation, and severe symptoms leading to death*). Finally,  
196 participants were asked about how much information they had seen, read or heard about coronavirus  
197 (nothing at all, a little, a moderate amount, a lot).

### 198 ***Health-Protective Behaviours***

199 To assess social distancing, hygiene and buying behaviours, participants were asked whether they  
200 had engaged in a total of 16 behaviours during the previous week (see Table 2). Response options for each  
201 item were *not at all*, *a little*, *some of the time*, *most of the time*, *all of the time*, and *not applicable*. Items  
202 were generated based on our previous study of COVID-19 (14) and from previous research examining  
203 health-protective behaviours in response to influenza, SARS and Middle East Respiratory Syndrome  
204 (MERS) outbreaks (e.g., 26).

## 205 Results

### 206 Demographics

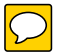

207 Demographic characteristics of the sample are depicted in Table 1. Overall, the sample was mostly female  
208 (86%), identified as being Caucasian (75%), mainly spoke English at home (91%), and ranged in age from  
209 18 to over 75. Participants were from various states and territories of Australia, with the majority living in  
210 the most populated states of New South Wales, Victoria or Queensland. Sixty five percent were working in a  
211 paid job, and approximately one third were carers (for children, or people with a disability, illness, or the  
212 elderly). Respondents' self-rated health was measured on a scale from poor (1) to excellent (5), with a mean  
213 of 3.0 ( $SD = 0.97$ ). The majority of participants rated their health as 'fair' (24.4%), 'good' (37.7%), or 'very  
214 good' (24.4%); relatively few participants rated their health as 'poor' (5.3%) or 'excellent' (5.3%).

### 215 Health-Related Information

216 Only eight participants (0.2%) reported that they themselves currently have or have had COVID-19, 9.2%  
217 were unsure, and 1.2% suspected they had COVID-19. Approximately 4.8% reported their family or friends  
218 had caught COVID-19, and 8.2% were unsure. Almost half (48.8%) reported being in voluntary self-  
219 isolation, 2.4% reported being in 'forced self-isolation' and 48.8% were not self-isolating.

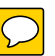

**Table 1. Demographic characteristics of the sample**

| <b>Demographic Variables</b>                  | <b>N (%)</b> |
|-----------------------------------------------|--------------|
| <b>Gender</b>                                 |              |
| Male                                          | 656 (12.94)  |
| Female                                        | 4348 (85.78) |
| Non-binary                                    | 42 (0.83)    |
| Different identity                            | 8 (0.16)     |
| Prefer not to say                             | 15 (0.28)    |
| <b>State</b>                                  |              |
| New South Wales                               | 1669 (32.93) |
| Victoria                                      | 1236 (24.38) |
| Queensland                                    | 878 (17.32)  |
| South Australia                               | 407 (8.03)   |
| Western Australia                             | 490 (9.67)   |
| Tasmania                                      | 215 (4.24)   |
| Australian Capital Territory                  | 141 (2.78)   |
| Northern Territory                            | 31 (0.61)    |
| <b>Age Group</b>                              |              |
| 18-24                                         | 268 (5.29)   |
| 25-34                                         | 773 (15.25)  |
| 35-44                                         | 1016 (20.04) |
| 45-54                                         | 1190 (23.48) |
| 55-64                                         | 1207 (23.81) |
| 65-74                                         | 497 (9.80)   |
| 75+                                           | 51 (1.01)    |
| Not stated                                    | 67 (1.32)    |
| <b>Ethnicity</b>                              |              |
| Caucasian (White / European)                  | 3812 (75.20) |
| Aboriginal and/or Torres Strait Islander      | 77 (1.52)    |
| Asian                                         | 79 (1.56)    |
| Mixed ethnicity or other                      | 307 (6.06)   |
| Prefer not to say or missing                  | 794 (15.66)  |
| <b>Highest Education</b>                      |              |
| Less than High school (Year 12 or equivalent) | 275 (5.43)   |
| High school only: completed (Year 12)         | 419 (8.27)   |
| Certificate, or diploma                       | 1485 (29.30) |
| Bachelor's degree or higher                   | 2888 (56.97) |
| Not stated                                    | 2 (0.04)     |
| <b>English main language spoken at home</b>   |              |
| Yes                                           | 4628 (91.30) |
| <b>Employment (tick all that apply)</b>       |              |
| I am a permanent employee                     | 2194 (43.3)  |
| I am working on a fixed term contract         | 362 (7.1)    |
| I have a casual job                           | 432 (8.5)    |
| I am self-employed                            | 388 (7.7)    |
| I am an independent contractor                | 118 (2.3)    |
| I am an at home parent                        | 221 (4.4)    |
| I am a student                                | 395 (7.8)    |
| I am a carer                                  | 129 (2.5)    |
| I am retired                                  | 646 (12.7)   |



|                                                                |              |
|----------------------------------------------------------------|--------------|
| I am seeking work                                              | 203 (4.0)    |
| I am not working and on disability benefits                    | 258 (5.1)    |
| I am not working as I have lost my job due to COVID19          | 314 (6.2)    |
| I am not working for other reasons                             | 341 (6.7)    |
| <b>Industry of main job</b>                                    |              |
| Health care or social assistance                               | 1039 (32.2)  |
| Education and training                                         | 613 (19.0)   |
| Administration and social support                              | 168 (5.5)    |
| Professional, scientific and technical services                | 242 (7.5)    |
| Retail trade                                                   | 137 (4.2)    |
| Other                                                          | 1109 (31.6)  |
| <b>Carer status</b>                                            |              |
| Carer for children                                             | 1196 (23.6)  |
| Carer for person with disability, illness or who is frail aged | 772 (15.2)   |
| <b>Isolation</b>                                               |              |
| No                                                             | 2475 (48.8)  |
| Yes -voluntary self- isolation                                 | 2472 (48.8)  |
| Yes – forced self-isolation                                    | 120 (2.4)    |
| <b>COVID-19 diagnosis</b>                                      |              |
| No/Never                                                       | 4534 (89.4)  |
| Unsure/Other                                                   | 462 (9.2)    |
| Current diagnosis (confirmed with diagnostic test)             | 5 (0.10)     |
| Suspect I have COVID-19                                        | 63 (1.2)     |
| I have had COVID-19 in the past and now recovered              | 3 (0.10)     |
| <b>Family/friends diagnosed with COVID-19</b>                  |              |
| Yes                                                            | 242 (4.8)    |
| No                                                             | 4411 (87.0)  |
| Unsure                                                         | 414 (8.2)    |
| <b>Mental health diagnosis</b>                                 |              |
| Yes                                                            | 3581 (70.65) |
| No                                                             | 1351 (26.65) |
| Unsure                                                         | 99 (1.95)    |
| Prefer not to say                                              | 38 (0.75)    |
| <b>Current mental health treatment</b>                         |              |
| Yes                                                            | 2288 (45.14) |
| No                                                             | 2747 (54.19) |
| Unsure                                                         | 13 (0.26)    |
| Prefer not to say                                              | 21 (0.41)    |
| <b>Chronic illness</b>                                         |              |
| Yes                                                            | 1941 (38.29) |
| No                                                             | 2584 (50.98) |
| Unsure                                                         | 362 (7.14)   |
| Prefer not to say                                              | 34 (0.67)    |
| Missing                                                        | 148 (2.92)   |
| <b>Self-rated health<sup>a</sup></b>                           |              |
| Excellent                                                      | 269 (5.3)    |
| Very good                                                      | 1236 (24.4)  |
| Good                                                           | 1910 (37.7)  |
| Fair                                                           | 1235 (24.4)  |
| Poor                                                           | 270 (5.3)    |

Note. a. n=4920

## COVID-19 Fears and Perceived Risk

Level of concern and worry about the possibility of contracting COVID-19 was moderate ( $M = 2.84$ ,  $SD = 1.07$ , range 1-5, where 1 = *not at all*, 5 = *extremely concerned*). A small proportion reported being '*not at all concerned*' (7.6%), 35% reported being '*a little*' concerned, 31.4% were '*moderately concerned*', 17.2% were '*very concerned*', and 8.5% were '*extremely concerned*' about contracting COVID-19.

Respondents' ratings of the perceived likelihood of contracting COVID-19 was moderate ( $M = 48.25$ ,  $SD = 24.84$ ; scale from 0 to 100). Perceived behavioural control, or the belief that personal protective behaviours could help prevent infection, had a mean score of 71.64 ( $SD = 19.69$ ). With regard to perceived severity of symptoms if they caught coronavirus, only 0.3% of respondents indicated that they would experience no symptoms; with mild (19.6%) and moderate (43.9%) symptoms most commonly expected. However, one in three respondents perceived the illness severity to be high: with 20.1% indicating they thought they would experience severe symptoms, severe symptoms requiring hospitalisation (12.0%), or severe symptoms leading to death (4.1%). In terms of the amount of information participants had been exposed to about the coronavirus in the past week, most participants (75%) reported having 'a lot' of exposure to information, 21.6% reported a 'moderate amount', whereas very few reported a little (3.3%) or no information at all (0.1%).

## COVID-19 Fears (Others)

Participants' overall level of concern and worry about friends and loved ones contracting COVID-19 was moderate ( $M = 3.53$ ,  $SD = 1.03$ , range 1-5, where 1 = *not at all*, 5 = *extremely concerned*). A small proportion reported that they were '*not at all concerned*' (1.6%), 16.5% reported being '*a little*' concerned, 29.2% were '*moderately concerned*', 33.1% were '*very concerned*', and 19.6% '*extremely concerned*' about their friends or family members contracting COVID-19.

## Health-Protective Behaviours

The percentage of respondents who reported having engaged in a range of distancing and hygiene behaviours during the past week is presented in Table 2. During the previous week, handwashing and social distancing (avoiding social events and gatherings) were the most common behaviours.

Table 2. Frequency of health-protective behaviours during the past week

|                                                                                            | N/A          | Not at all   | A little     | Some of the time | Most of the time | All of the time |
|--------------------------------------------------------------------------------------------|--------------|--------------|--------------|------------------|------------------|-----------------|
| <b>Avoided going to work or university</b>                                                 | 1702 (33.58) | 1120 (22.10) | 170 (3.35)   | 197 (3.89)       | 306 (6.04)       | 1567 (30.91)    |
| <b>Avoided using public transport</b>                                                      | 1828 (36.06) | 142 (2.80)   | 70 (1.38)    | 75 (1.48)        | 199 (3.93)       | 2748 (54.21)    |
| <b>Avoided flying domestically or internationally</b>                                      | 2323 (45.83) | 113 (2.23)   | 22 (0.43)    | 19 (0.37)        | 34 (0.67)        | 2549 (50.29)    |
| <b>Avoided social events or public gatherings</b>                                          | 234 (4.62)   | 47 (0.93)    | 58 (1.14)    | 62 (1.22)        | 492 (9.71)       | 4168 (82.23)    |
| <b>Avoiding socialising (in person) with anyone outside of your household</b>              | 82 (1.62)    | 90 (1.78)    | 170 (3.35)   | 225 (4.44)       | 1495 (29.49)     | 2997 (59.12)    |
| <b>Avoided going to hospitals or going to the doctor unless absolutely necessary</b>       | 1015 (20.02) | 280 (5.52)   | 167 (3.29)   | 155 (3.06)       | 561 (11.07)      | 2881 (56.84)    |
| <b>Avoided going into shops</b>                                                            | 35 (0.69)    | 275 (5.43)   | 493 (9.73)   | 1017 (20.06)     | 2533 (49.97)     | 706 (13.93)     |
| <b>Avoided staying in hotels, hostels, or Airbnb's</b>                                     | 2572 (50.74) | 108 (2.13)   | 13 (0.26)    | 14 (0.28)        | 37 (0.73)        | 2315 (45.67)    |
| <b>Avoided sending your children to school or childcare</b>                                | 3745 (73.88) | 217 (4.28)   | 42 (0.83)    | 67 (1.32)        | 123 (2.43)       | 865 (17.06)     |
| <b>Stayed at home as much as possible</b>                                                  | 38 (0.75)    | 31 (0.61)    | 56 (1.10)    | 219 (4.32)       | 2310 (45.57)     | 2406 (47.46)    |
| <b>Cleaned or disinfected things you touch (such as doorknobs or hard surfaces)</b>        | 31 (0.61)    | 592 (11.68)  | 697 (13.75)  | 1387 (27.36)     | 1390 (27.42)     | 964 (19.02)     |
| <b>Used sanitising hand gel to clean your hands</b>                                        | 92 (1.81)    | 441 (8.70)   | 428 (8.44)   | 1153 (22.75)     | 1286 (25.37)     | 1661 (32.77)    |
| <b>Washed your hands thoroughly</b>                                                        | 10 (0.20)    | 7 (0.14)     | 34 (0.67)    | 150 (2.96)       | 1382 (27.26)     | 3475 (68.55)    |
| <b>Worn a face mask when going out in public</b>                                           | 261 (5.15)   | 4067 (80.23) | 193 (3.81)   | 223 (4.40)       | 148 (2.92)       | 169 (3.33)      |
| <b>Avoided touching objects or surfaces knowing they have been touched by other people</b> | 77 (1.52)    | 188 (3.71)   | 416 (8.21)   | 881 (17.38)      | 2005 (39.55)     | 1493 (29.45)    |
| <b>Purchased significantly more than you normally would when grocery shopping</b>          | 73 (1.44)    | 2008 (39.61) | 1406 (27.74) | 927 (18.29)      | 398 (7.85)       | 248 (4.89)      |

Note. Numbers represent n and proportion (%) in brackets.

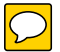

## 246 **Mental Health**

247 More than three quarters of participants reported that their mental health had been worse since the  
248 outbreak, with 55.1% selecting '*a little worse*', and 22.9% selecting '*a lot worse*'. A small proportion  
249 reported improvements in their mental health since the outbreak (5.5%) (see Figure 1). A chi square analysis  
250 revealed that there was a significant difference in the impact of COVID-19 on mental health for participants  
251 with and without a prior mental health diagnosis ( $\chi^2(4) = 141.44, p < .001$ ), with 26.6% of those with a  
252 prior mental health diagnosis saying their mental health had been '*a lot worse*', relative to 13.4% in the  
253 group without a mental health diagnosis.

Figure 1. Proportion of participants reporting how their mental health has been since the start of the COVID-19 outbreak, in the Total Sample (Left), the sub-sample with a prior mental health diagnosis (middle) and no prior mental health diagnosis (right).

Figure 2. Proportion (% of total sample) of participants reporting worry about finances, uncertainty about the future and feelings of loneliness.

254 Almost 80% of individuals reported moderate to extreme levels of uncertainty about the future; half  
255 (50.1%) reported feeling moderately to extremely lonely, and half reported moderate to extreme worry about  
256 their financial situation (50.1%). See Figure 2 for results.

257 Table 3 shows the proportion of participants who scored across the severity categories of the DASS-  
258 21 subscales. Only 38.2% of respondents scored in the normal range for depression, 50.2% in the normal  
259 range for anxiety, and 45.5% for stress. In contrast, 37.1%, 29.1%, and 33.6% fell in the mild to moderate  
260 range for depression, anxiety, and stress respectively, whereas 24.1%, 20.3%, and 20.4% reported severe or  
261 extremely severe stress levels. On the Whiteley-6, 21.6% scored in the range indicating elevated health  
262 anxiety. Of the participants who had valid scores on the Physical Activity Vital Sign (N=4845), 42.7% met

263 national guidelines for 150 minutes of moderate to vigorous physical activity in the past week. On the  
264 AUDIT-C brief screener for alcohol use, approximately 52.7% showed hazardous drinking levels.  
265 Hazardous drinking levels were defined as an AUDIT-C score of 3 or more for women and other genders,  
266 and 4 or more for men (28, 29).

Table 3. Psychological distress, health anxiety, alcohol use, and physical activity

|                                                                | <b>Normal</b> | <b>Mild</b>                                                                                 | <b>Moderate</b> | <b>Severe</b> | <b>Extremely Severe</b> |
|----------------------------------------------------------------|---------------|---------------------------------------------------------------------------------------------|-----------------|---------------|-------------------------|
| <b>DASS-21</b>                                                 | n (%)         | n (%)                                                                                       | n (%)           | n (%)         | n (%)                   |
| <b>Depression Subscale</b>                                     | 1936 (38.19)  | 765 (15.09)                                                                                 | 1124 (22.17)    | 533 (10.51)   | 691 (13.63)             |
| <b>Anxiety Subscale</b>                                        | 2546 (50.23)  | 434 (8.56)                                                                                  | 1039 (20.50)    | 397 (7.83)    | 633 (12.49)             |
| <b>Stress Subscale</b>                                         | 2308 (45.53)  | 778 (15.35)                                                                                 | 927 (18.29)     | 720 (14.20)   | 316 (6.23)              |
|                                                                | <b>M</b>      |  <b>SD</b> |                 |               |                         |
| <b>DASS-21 Total</b>                                           | 40.19         | 25.07                                                                                       |                 |               |                         |
| <b>DASS-21 Depression Subscale</b>                             | 14.14         | 10.56                                                                                       |                 |               |                         |
| <b>DASS-21 Anxiety Subscale</b>                                | 8.98          | 8.21                                                                                        |                 |               |                         |
| <b>DASS-21 Stress Subscale</b>                                 | 17.07         | 9.49                                                                                        |                 |               |                         |
| <b>Whiteley-6 Total (Health Anxiety)</b>                       | 13.18         | 5.61                                                                                        |                 |               |                         |
| <b>Padua Contamination &amp; Washing Subscale <sup>a</sup></b> | 10.76         | 8.78                                                                                        |                 |               |                         |
| <b>Physical activity vital sign <sup>b</sup></b>               | 186.86        | 369.39                                                                                      |                 |               |                         |
| <b>AUDIT-C (alcohol) <sup>c</sup></b>                          | 3.66          | 2.02                                                                                        |                 |               |                         |

**Note.** DASS-21 = Depression Anxiety Stress 21-item scale. a. n=4928, b. n=4845. c. n=4828

267  
268  
269  
270  
271  
272  
273  
274

## Comparison between people with and without prior mental health diagnosis

People with and without a self-reported history of mental health diagnosis were compared in their severity of COVID-19 fears, mental health, distress, health anxiety, alcohol use, contamination fears, and physical activity. People with a previous self-reported mental health diagnosis reported higher uncertainty, loneliness, financial worries, COVID-19 fears (self and others), believed they were more likely to contract COVID-19, had lower perceived behavioural control, had higher rates of psychological distress, health anxiety and contamination fears, and lower physical activity than those without a self-reported mental health diagnosis history. There were no differences in alcohol use between these groups (see Table 4).

**Table 4. Mental health in people with and without a prior self-reported mental health diagnosis.**

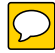

|                                             | Prior mental health diagnosis |       |       | No prior mental health diagnosis |       |       | Independent samples <i>t</i> test |
|---------------------------------------------|-------------------------------|-------|-------|----------------------------------|-------|-------|-----------------------------------|
|                                             | N                             | Mean  | SD    | N                                | Mean  | SD    |                                   |
| <b>Uncertain: future</b>                    | 3581                          | 3.57  | 1.07  | 1351                             | 3.21  | 1.05  | t (4930) = 10.63, p = 0.00        |
| <b>Lonely</b>                               | 3581                          | 2.83  | 1.29  | 1351                             | 2.23  | 1.16  | t (4930) = 14.89, p = 0.00        |
| <b>Worry: finances</b>                      | 3581                          | 2.83  | 1.26  | 1351                             | 2.41  | 1.19  | t (4930) = 10.68, p = 0.00        |
| <b>Worry: contracting COVID-19</b>          | 3574                          | 2.89  | 1.08  | 1344                             | 2.71  | 1.03  | t (4916) = 5.23, p = 0.00         |
| <b>Perceived likelihood</b>                 | 3575                          | 49.04 | 24.88 | 1347                             | 45.97 | 24.61 | t (4920) = 3.87, p = 0.00         |
| <b>Perceived control</b>                    | 3574                          | 71.05 | 19.79 | 1346                             | 73.41 | 19.25 | t (4918) = -3.76, p = 0.00        |
| <b>Severity of illness</b>                  | 3564                          | 3.44  | 1.07  | 1341                             | 3.16  | 1.02  | t (4903) = 8.39, p = 0.00         |
| <b>Worry: loved ones contracting COVID-</b> | 3581                          | 3.59  | 1.03  | 1351                             | 3.38  | 1.02  | t (4930) = 6.22, p = 0.00         |
| <b>Self-rated health</b>                    | 3481                          | 2.85  | 0.94  | 1310                             | 3.39  | 9.40  | t (4789) = 17.73, p = 0.00        |
| <b>DASS-21 Total</b>                        | 3567                          | 45.52 | 25.26 | 1345                             | 26.57 | 18.93 | t (4910) = 25.00, p = 0.00        |
| <b>DASS-21 Depression</b>                   | 3567                          | 16.22 | 10.85 | 1345                             | 8.87  | 7.70  | t (4910) = 22.78, p = 0.00        |
| <b>DASS-21 Anxiety</b>                      | 3567                          | 10.47 | 8.50  | 1345                             | 5.12  | 5.98  | t (4910) = 21.19, p = 0.00        |
| <b>DASS-21 Stress</b>                       | 3567                          | 18.83 | 9.44  | 1345                             | 12.58 | 8.12  | t (4910) = 21.49, p = 0.00        |

|                                             |          |          |        |          |          |        |                               |
|---------------------------------------------|----------|----------|--------|----------|----------|--------|-------------------------------|
| <b>Whiteley-6 (health anxiety)</b>          | 3575     | 13.93    | 5.75   | 1351     | 11.19    | 4.74   | t (4924) = 15.63, p = 0.00    |
| <b>Contamination Fears</b>                  | 3483     | 11.42    | 9.05   | 1319     | 9.12     | 7.87   | t (4800) = 8.14, p = 0.00     |
| <b>AUDIT-C Total (alcohol)</b>              | 3411     | 3.10     | 2.72   | 1289     | 3.23     | 2.44   | t (4698) = -1.45, p = 0.15    |
| <b>PAVS Total (physical activity)</b>       | 3429     | 170.90   | 360.41 | 1289     | 226.32   | 393.88 | t (4716) = -4.59, p = 0.00    |
|                                             | <b>n</b> | <b>%</b> |        | <b>n</b> | <b>%</b> |        |                               |
| <b>Whiteley-6 (elevated health anxiety)</b> | 923      | 25.8     |        | 146      | 10.8     |        | $\chi^2 (1) = 130.03$ p <.001 |
| <b>AUDIT-C (hazardous drinking)</b>         | 1742     | 48.6     |        | 737      | 54.6     |        | $\chi^2 (1) = 52.52$ p <.001  |
| <b>PAVS (inactive)</b>                      | 1349     | 58.1     |        | 631      | 49.0     |        | $\chi^2 (1) = 13.99$ p <.001  |

275 **Impact of self-isolation:** Compared to people who were not in self isolation, people who self-reported being  
276 in self-isolation reported higher uncertainty, loneliness, financial worries, and COVID-19 fears (self and  
277 others), rated the symptoms of COVID-19 as more serious, but believed they were less likely to contract  
278 COVID-19, and perceived more behavioural control over COVID-19. They also had higher rates of  
279 psychological distress, health anxiety and contamination fears, and lower alcohol use than those not in  
280 isolation. There were no differences in physical activity between these groups (see Table 5).

**Table 5. Comparison between those in self-isolation versus not in self isolation**

|                                    | Not in self-isolation |       |       | In self-isolation |       |       | Independent samples <i>t</i> test |
|------------------------------------|-----------------------|-------|-------|-------------------|-------|-------|-----------------------------------|
|                                    | N                     | M     | SD    | N                 | M     | SD    |                                   |
| <b>Uncertain: future</b>           | 2475                  | 3.41  | 1.06  | 2592              | 3.52  | 1.08  | t (5065) = 3.63, p = 0.00         |
| <b>Lonely</b>                      | 2475                  | 2.56  | 1.26  | 2592              | 2.76  | 1.29  | t (5065) = 5.52, p = 0.00         |
| <b>Worry: finances</b>             | 2475                  | 2.64  | 1.22  | 2592              | 2.78  | 1.27  | t (5065) = 4.09, p = 0.00         |
| <b>Worry: contracting COVID-19</b> | 2473                  | 2.77  | 1.05  | 2580              | 2.91  | 1.08  | t (5051) = 4.65, p = 0.00         |
| <b>Perceived likelihood</b>        | 2473                  | 49.27 | 25.26 | 2584              | 47.27 | 24.40 | t (5055) = -2.86, p = 0.00        |
| <b>Perceived control</b>           | 2473                  | 70.16 | 20.36 | 2582              | 73.06 | 18.93 | t (5053) = 5.26, p = 0.00         |
| <b>Severity of illness</b>         | 2467                  | 3.18  | 0.94  | 2573              | 3.53  | 1.14  | t (5038) = 11.95, p = 0.00        |



|                                             |      |        |        |      |        |        |                            |
|---------------------------------------------|------|--------|--------|------|--------|--------|----------------------------|
| <b>Worry: loved ones contracting COVID-</b> | 2475 | 3.44   | 1.04   | 2592 | 3.60   | 1.02   | t (5065) = 5.51, p = 0.00  |
| <b>Self-rated health</b>                    | 2339 | 3.10   | 0.94   | 2452 | 2.90   | 0.99   | t (4789) = 6.92, p = 0.00  |
| <b>DASS-21 Total</b>                        | 2461 | 38.05  | 24.44  | 2586 | 42.26  | 25.48  | t (5045) = 5.99, p = 0.00  |
| <b>DASS-21 Depression</b>                   | 2461 | 13.24  | 10.32  | 2586 | 15.01  | 10.72  | t (5045) = 5.97, p = 0.00  |
| <b>DASS-21 Anxiety</b>                      | 2461 | 8.15   | 7.85   | 2586 | 9.78   | 8.47   | t (5045) = 7.10, p = 0.00  |
| <b>DASS-21 Stress</b>                       | 2461 | 16.66  | 9.35   | 2586 | 17.47  | 9.60   | t (5045) = 3.03, p = 0.00  |
| <b>Whiteley-6 (health anxiety)</b>          | 2470 | 12.27  | 5.20   | 2591 | 14.06  | 5.85   | t (5059) = 11.52, p = 0.00 |
| <b>Contamination Fears</b>                  | 2414 | 9.92   | 8.30   | 2514 | 11.56  | 9.14   | t (4926) = 6.60, p = 0.00  |
| <b>AUDIT-C Total (alcohol)</b>              | 2358 | 3.25   | 2.63   | 2470 | 3.02   | 2.65   | t (4826) = -3.02, p = 0.00 |
| <b>PAVS Total (physical activity)</b>       | 2362 | 190.10 | 296.41 | 2483 | 183.77 | 427.44 | t (4843) = -0.60, p = 0.55 |

## 281 Predictors of Depression, Anxiety and Stress

282 Separate linear regression analyses were conducted to explore the demographic, occupational, and  
 283 psychological predictors of DASS-21 depression, anxiety and stress severity (see final model in Table 8). 

284 We entered demographic predictor variables (gender, age, occupational status, education, Aboriginal and/or  
 285 Torres Strait Islander and carer status) in the first step. In the second step, we entered general health  
 286 variables including chronic illness, mental health diagnosis history, and self-rated health. In the third step,  
 287 we entered uncertainty about the future, loneliness, worry about finances. In the final step, we added  
 288 COVID-19 variables (whether they were in self-isolation, hygiene behaviours, exposure to COVID-19  
 289 information, risk perceptions including perceived likelihood, perceived control, and severity of illness,  
 290 concern/worry about contracting COVID-19, and concern/worry about loved ones contracting COVID-19.

291 **Depression.** Demographic variables accounted for 10.8% of the variance ( $R^2_{\text{change}}=0.11$ ,  $SE=10.02$ ,  $F_{\text{change}}$   
 292 (18, 4971), = 33.32,  $p < .001$ ). Entering the mental health diagnosis, chronic illness, and self-rated health  
 293 variables accounted for 9.5% of additional variance ( $R^2_{\text{change}}=0.095$ ,  $SE=9.47$ ,  $F_{\text{change}}(3, 4788)$ , = 191.73,  $p$   
 294  $< .001$ ). In the third step, entering mental health variables accounted for 27.5% unique variance ( $R^2$

295  $\Delta R^2_{\text{change}}=0.28$ ,  $SE=7.66$ ,  $F_{\text{change}}(3, 4785) = 845.35$ ,  $p < .001$ ). Finally, the COVID-19 variables accounted for  
296 0.7% unique variance ( $R^2_{\text{change}}=0.007$ ,  $SE=7.61$ ,  $F_{\text{change}}(3, 4777) = 8.02$ ,  $p < .001$ ). The final model is  
297 presented in Table 8 and accounted for 48.5% of the variance in depression scores.

298 Controlling for the other variables in the model, being female, more well educated, older, and having better  
299 self-rated health were all associated with lower depression, whereas being unemployed, a student, retired,  
300 carer or stay at home parent were associated with higher depression. Mental health and chronic illness  
301 diagnoses were associated with higher depression, as were increased uncertainty about the future, loneliness,  
302 and financial worries. Of the COVID-19 variables, higher worry about COVID-19 and perceived  
303 behavioural control over COVID-19 infection were associated with lower depression, whereas perceiving  
304 higher illness severity was associated with higher depression.

305 **Anxiety.** In the first step, demographic variables accounted for 10.7% of the variance in anxiety scores ( $R^2_{\text{change}}=0.11$ ,  
306  $SE=7.77$ ,  $F_{\text{change}}(18, 4791) = 33.05$ ,  $p < .001$ ). Entering the health variables (mental health  
307 diagnosis, chronic illness, and self-rated health) accounted for 8.3% of additional variance ( $R^2_{\text{change}}=0.083$ ,  
308  $SE=7.40$ ,  $F_{\text{change}}(3, 4788) = 163.28$ ,  $p < .001$ ). In the third step, entering mental health variables accounted  
309 for 15.3% unique variance ( $R^2_{\text{change}}=0.15$ ,  $SE=6.67$ ,  $F_{\text{change}}(3, 4785) = 372.11$ ,  $p < .001$ ). Finally, the  
310 COVID-19 variables accounted for 2.7% unique variance ( $R^2_{\text{change}}=0.027$ ,  $SE=6.53$ ,  $F_{\text{change}}(3, 4777) =$   
311  $25.55$ ,  $p < .001$ ). The final model is presented in Table 8 and accounted for 36.5% of the variance in anxiety  
312 scores.

313 Controlling for other variables in the model, being female, non-binary or different gender identity, and being  
314 Aboriginal and/or Torres Strait Islander were predictors of higher anxiety. Older age, and more well  
315 educated (certificate, degree or higher) were predictors of lower anxiety. In contrast to depression, only  
316 being a student predicted worse anxiety. Having a chronic illness, and prior history of mental health  
317 diagnosis were associated with higher anxiety, whereas better self-rated health was a predictor of lower  
318 anxiety. Similar to depression, increased uncertainty about the future, loneliness, and financial worries were  
319 also associated with higher anxiety. Of the COVID-19 variables, more hygiene behaviours, worry about  
320 COVID-19, worry about loved ones contracting COVID-19, and higher perceived illness severity were

321 predictors of higher anxiety, whereas increased exposure to COVID-19 information, and perceived control  
322 over COVID-19 predicted lower anxiety.

323 **Stress.** In the first step, demographic variables accounted for 10.8% of the variance in anxiety scores ( $R^2$   
324  $\text{change}=0.11$ ,  $SE=8.99$ ,  $F_{\text{change}}(18, 4791) = 33.49$ ,  $p < .001$ ). Entering the health variables (mental health  
325 diagnosis, chronic illness, and self-rated health) accounted for 6.9% of additional variance ( $R^2_{\text{change}}=0.069$ ,  
326  $SE=8.63$ ,  $F_{\text{change}}(3, 4788) = 135.07$ ,  $p < .001$ ). In the third step, entering mental health variables accounted  
327 for 19.4% unique variance ( $R^2_{\text{change}}=0.19$ ,  $SE=7.54$ ,  $F_{\text{change}}(3, 4785) = 496.74$ ,  $p < .001$ ). Finally, the  
328 COVID-19 variables accounted for 1.8% unique variance ( $R^2_{\text{change}}=0.018$ ,  $SE=7.44$ ,  $F_{\text{change}}(3, 4777) =$   
329  $17.68$ ,  $p < .001$ ). The final model is presented in Table 8 and accounted for 38.9% of the variance in stress  
330 scores.

331 Controlling for other variables in the model, identifying as non-binary or different gender identity,  
332 Aboriginal and/or Torres Strait Islander, predicted higher stress. Being more well-educated with a trade  
333 certificate, and older age, were predictors of lower stress. Being a stay at home parent was a predictor of  
334 higher stress. Having a chronic illness, and prior history of mental health diagnosis were associated with  
335 higher stress, whereas better self-rated health was a predictor of lower stress. Increased uncertainty about the  
336 future, loneliness, and financial worries were also associated with higher stress. Of the COVID-19 variables,  
337 more hygiene behaviours, worry about loved ones contracting COVID-19, and higher perceived likelihood  
338 of contacting COVID 19 were predictors of higher stress. Higher perceived control over COVID-19  
339 predicted lower stress.

Table 8. Predictors of depression, anxiety and stress severity (DASS-21 scores)

| Variable                                        | DASS-21 Depression |      |        |       |             | DASS-21 Anxiety |      |        |       |             | DASS-21 Stress |      |        |       |             |
|-------------------------------------------------|--------------------|------|--------|-------|-------------|-----------------|------|--------|-------|-------------|----------------|------|--------|-------|-------------|
|                                                 | B                  | SE   | Exp(B) | t     | p           | B               | SE   | Exp(B) | t     | p           | B              | SE   | Exp(B) | t     | p           |
| Constant                                        | 5.51               | 1.43 |        | 3.84  | 0.00        | 1.05            | 1.23 |        | 0.85  | 0.39        | 3.87           | 1.40 |        | 2.76  | 0.01        |
| <b>Gender</b>                                   |                    |      |        |       |             |                 |      |        |       |             |                |      |        |       |             |
| Male (RC)                                       |                    |      |        |       |             |                 |      |        |       |             |                |      |        |       |             |
| Female                                          | -1.08              | 0.33 | -0.04  | -3.27 | <b>0.00</b> | 0.60            | 0.28 | 0.03   | 2.10  | <b>0.04</b> | 0.36           | 0.32 | 0.01   | 1.11  | 0.27        |
| Non-binary or different identity                | 0.57               | 1.16 | 0.01   | 0.49  | 0.62        | 1.71            | 1.00 | 0.02   | 1.71  | <b>0.09</b> | 3.69           | 1.14 | 0.04   | 3.25  | <b>0.00</b> |
| Prefer not to say                               | -0.68              | 2.33 | 0.00   | -0.29 | 0.77        | 4.60            | 2.00 | 0.03   | 2.30  | <b>0.02</b> | 3.42           | 2.27 | 0.02   | 1.50  | 0.13        |
| <b>Age</b>                                      |                    |      |        |       |             |                 |      |        |       |             |                |      |        |       |             |
| 18 to 24 (RC)                                   |                    |      |        |       |             |                 |      |        |       |             |                |      |        |       |             |
| 25-34                                           | -1.84              | 0.58 | -0.06  | -3.16 | <b>0.00</b> | -2.17           | 0.50 | -0.10  | -4.34 | <b>0.00</b> | -1.58          | 0.57 | -0.06  | -2.77 | <b>0.01</b> |
| 35-44                                           | -2.39              | 0.58 | -0.09  | -4.12 | <b>0.00</b> | -3.21           | 0.50 | -0.16  | -6.46 | <b>0.00</b> | -1.69          | 0.57 | -0.07  | -2.98 | <b>0.00</b> |
| 45-54                                           | -2.33              | 0.58 | -0.09  | -4.02 | <b>0.00</b> | -4.06           | 0.50 | -0.21  | -8.16 | <b>0.00</b> | -3.08          | 0.57 | -0.14  | -5.43 | <b>0.00</b> |
| 55-64                                           | -2.34              | 0.59 | -0.09  | -3.98 | <b>0.00</b> | -4.66           | 0.51 | -0.24  | -9.22 | <b>0.00</b> | -4.47          | 0.57 | -0.20  | -7.77 | <b>0.00</b> |
| 65-74                                           | -3.27              | 0.73 | -0.09  | -4.50 | <b>0.00</b> | -5.41           | 0.62 | -0.20  | -8.67 | <b>0.00</b> | -6.03          | 0.71 | -0.19  | -8.48 | <b>0.00</b> |
| 75 and older                                    | -3.46              | 1.30 | -0.03  | -2.66 | <b>0.01</b> | -4.82           | 1.12 | -0.06  | -4.31 | <b>0.00</b> | -6.63          | 1.27 | -0.07  | -5.22 | <b>0.00</b> |
| <b>Aboriginal and/or Torres Strait Islander</b> | 1.46               | 0.90 | 0.02   | 1.62  | 0.11        | 1.63            | 0.77 | 0.02   | 2.11  | <b>0.04</b> | 1.94           | 0.88 | 0.02   | 2.21  | <b>0.03</b> |
| <b>Education</b>                                |                    |      |        |       |             |                 |      |        |       |             |                |      |        |       |             |
| Less than high school (RC)                      |                    |      |        |       |             |                 |      |        |       |             |                |      |        |       |             |
| High school only                                | 0.08               | 0.62 | 0.00   | 0.13  | 0.90        | -0.75           | 0.53 | -0.02  | -1.41 | 0.16        | -0.70          | 0.61 | -0.02  | -1.15 | 0.25        |
| Trade certificate or diploma                    | -0.90              | 0.52 | -0.04  | -1.74 | <b>0.08</b> | -0.98           | 0.44 | -0.05  | -2.20 | <b>0.03</b> | -0.84          | 0.51 | -0.04  | -1.67 | <b>0.09</b> |
| Bachelor's degree or higher                     | -1.46              | 0.51 | -0.07  | -2.87 | <b>0.00</b> | -1.81           | 0.44 | -0.11  | -4.16 | <b>0.00</b> | -0.71          | 0.50 | -0.04  | -1.43 | 0.15        |
| <b>Employment Status</b>                        |                    |      |        |       |             |                 |      |        |       |             |                |      |        |       |             |
| Paid employment (RC)                            |                    |      |        |       |             |                 |      |        |       |             |                |      |        |       |             |
| Unemployed                                      | 0.04               | 0.55 | 0.00   | 0.07  | 0.94        | -0.41           | 0.47 | -0.01  | -0.88 | 0.38        | -0.68          | 0.54 | -0.02  | -1.26 | 0.21        |
| Student                                         | 2.26               | 0.32 | 0.08   | 7.17  | <b>0.00</b> | 1.08            | 0.27 | 0.05   | 4.00  | <b>0.00</b> | 0.15           | 0.31 | 0.01   | 0.49  | 0.63        |
| Retired                                         | 0.82               | 0.47 | 0.03   | 1.74  | <b>0.08</b> | 0.19            | 0.41 | 0.01   | 0.47  | 0.63        | -0.23          | 0.46 | -0.01  | -0.50 | 0.62        |
| At home parent                                  | 1.01               | 0.57 | 0.02   | 1.77  | <b>0.08</b> | -0.34           | 0.49 | -0.01  | -0.69 | 0.49        | 1.22           | 0.56 | 0.03   | 2.19  | <b>0.03</b> |

|                                                            |       |      |       |            |             |  |       |      |       |       |             |  |       |      |       |       |             |
|------------------------------------------------------------|-------|------|-------|------------|-------------|--|-------|------|-------|-------|-------------|--|-------|------|-------|-------|-------------|
| Carer                                                      | 1.54  | 0.71 | 0.02  | 2.18       | <b>0.03</b> |  | 0.36  | 0.61 | 0.01  | 0.59  | 0.56        |  | 0.59  | 0.69 | 0.01  | 0.85  | 0.39        |
| <b>Chronic illness</b>                                     | 0.33  | 0.19 | 0.02  | 1.72       | <b>0.08</b> |  | 0.57  | 0.17 | 0.04  | 3.44  | <b>0.00</b> |  | 0.38  | 0.19 | 0.03  | 2.01  | <b>0.04</b> |
| <b>Mental health diagnosis</b>                             | 2.23  | 0.24 | 0.10  | 9.38       | <b>0.00</b> |  | 1.88  | 0.20 | 0.11  | 9.22  | <b>0.00</b> |  | 2.51  | 0.23 | 0.13  | 10.81 | <b>0.00</b> |
| <b>Self-rated health</b>                                   | -1.40 | 0.13 | -0.13 | -<br>10.51 | <b>0.00</b> |  | -0.83 | 0.11 | -0.10 | -7.25 | <b>0.00</b> |  | -0.63 | 0.13 | -0.06 | -4.81 | <b>0.00</b> |
| <b>Uncertainty about future</b>                            | 2.07  | 0.13 | 0.21  | 15.75      | <b>0.00</b> |  | 1.26  | 0.11 | 0.16  | 11.17 | <b>0.00</b> |  | 1.96  | 0.13 | 0.22  | 15.24 | <b>0.00</b> |
| <b>Loneliness</b>                                          | 3.24  | 0.10 | 0.39  | 32.37      | <b>0.00</b> |  | 1.38  | 0.09 | 0.22  | 16.09 | <b>0.00</b> |  | 1.82  | 0.10 | 0.25  | 18.64 | <b>0.00</b> |
| <b>Worry about finances</b>                                | 0.73  | 0.10 | 0.09  | 7.04       | <b>0.00</b> |  | 0.46  | 0.09 | 0.07  | 5.19  | <b>0.00</b> |  | 0.40  | 0.10 | 0.05  | 3.95  | <b>0.00</b> |
| <b>Self-isolation</b>                                      | -0.05 | 0.23 | 0.00  | -0.23      | 0.82        |  | 0.33  | 0.20 | 0.02  | 1.66  | 0.10        |  | -0.11 | 0.23 | -0.01 | -0.50 | 0.62        |
| <b>Hygiene behaviours</b>                                  | -0.08 | 0.05 | -0.02 | -1.67      | 0.10        |  | 0.28  | 0.04 | 0.08  | 6.73  | <b>0.00</b> |  | 0.17  | 0.05 | 0.04  | 3.57  | <b>0.00</b> |
| <b>Exposure to COVID-19 information</b>                    | 0.13  | 0.21 | 0.01  | 0.61       | 0.54        |  | -0.58 | 0.18 | -0.04 | -3.16 | <b>0.00</b> |  | -0.09 | 0.21 | 0.00  | -0.43 | 0.67        |
| <b>Concern/worry about contracting COVID-19</b>            | -0.53 | 0.15 | -0.05 | -3.68      | <b>0.00</b> |  | 0.47  | 0.12 | 0.06  | 3.75  | <b>0.00</b> |  | 0.20  | 0.14 | 0.02  | 1.39  | 0.17        |
| <b>Likelihood of contracting COVID-19</b>                  | 0.01  | 0.01 | 0.03  | 2.15       | <b>0.03</b> |  | 0.00  | 0.00 | 0.01  | 1.00  | 0.32        |  | 0.01  | 0.01 | 0.03  | 2.48  | <b>0.01</b> |
| <b>Perceived control</b>                                   | -0.04 | 0.01 | -0.07 | -5.94      | <b>0.00</b> |  | -0.02 | 0.01 | -0.05 | -3.89 | <b>0.00</b> |  | -0.02 | 0.01 | -0.05 | -3.95 | <b>0.00</b> |
| <b>Severity of illness</b>                                 | 0.26  | 0.13 | 0.03  | 2.02       | <b>0.04</b> |  | 0.30  | 0.11 | 0.04  | 2.67  | <b>0.01</b> |  | -0.02 | 0.13 | 0.00  | -0.14 | 0.89        |
| <b>Concern/worry about loved ones contracting COVID-19</b> | 0.01  | 0.13 | 0.00  | 0.04       | 0.97        |  | 0.37  | 0.11 | 0.05  | 3.30  | <b>0.00</b> |  | 0.75  | 0.13 | 0.08  | 5.84  | <b>0.00</b> |

Note. B: N=4810. Unstandardized coefficient; SE: Standard error; Exp(B): Exponentiated regression coefficient; RC: Reference category.

## Discussion

This survey presents the first insight into how the COVID-19 pandemic has impacted the mental health of people living in Australia, in a sample of 5070 individuals. Rapidly disseminating an online survey enabled us to assess a large number of participants during the peak of the pandemic in Australia to identify fears and acute distress and identify the relationship between demographic and psychological predictors of mental health. While very few individuals reported that they (0.15%) or their family/friends (4.8%) had contracted COVID-19, one quarter (25.9%) of respondents were very or extremely worried about contracting COVID-19, and over half (52.7%) were very or extremely worried about their family and friends contracting COVID-19. Almost four in five participants reported that since the outbreak their mental health had worsened, with over half (55%) saying it had worsened a little, and almost a quarter of respondents (23%) saying it had worsened a lot. A small minority reported better mental health (4.8%). Results showed that many people are experiencing high levels of uncertainty about the future (80%), and half of respondents reporting moderate to extreme loneliness and worry about their financial situation. Given loneliness, social isolation, and financial stress are significant risk factors for poor mental and physical health, and risk factors for suicidal ideation (e.g., 19, 20, 30), these findings are concerning.

To rapidly respond to the evolving COVID-19 situation, we administered online validated self-report questionnaires rather than diagnostic interviews. It is important to note that these questionnaires assessed *symptoms* of distress during the past week and should not be taken as indicative of a ‘diagnosis’ of a depressive or anxiety disorder. We found higher than expected levels of acute distress based on research in China during the COVID-19 pandemic (8), and compared to normative data (22, 31). Between 20.3-24.1% of the current sample were experiencing severe or extremely severe levels of depression, anxiety and stress, and a further 18-22% moderate symptoms. Only 38% of the current sample had normal depression, 50% had normal anxiety, and 46% had normal stress levels, whereas in the Chinese sample reported by Wang et al. (8) 64-69% had normal anxiety, stress and depression on the DASS-21. These differences may be due to the high proportion of people with pre-existing mental health diagnoses (70%) in our sample, which have been shown to be a vulnerable group (8, 10), or because of the significant proportion with a self-reported chronic illness (38%), who may be more susceptible to more severe COVID-19 disease, and therefore more

367 distressed. Having a personal history of chronic illness was a consistent predictor of higher depression,  
368 anxiety and stress, whereas better self-rated health was associated with better mental health. Compared to  
369 the Australian population, this sample appeared to have poorer health, with 30% reported being in fair or  
370 poor health (compared to 15% in the Australian population), and 30% reporting being in very good or  
371 excellent health (compared to 56% of Australians) (32).

372 Our data gave some insights into other demographic variables which predict higher psychological  
373 distress. Specific occupational factors predicted higher distress levels: student status (depression and  
374 anxiety), being an at home parent (depression and stress), a carer or retired (predicted higher depression),  
375 whereas education was associated with lower psychological distress. In contrast to past research, identifying  
376 as female predicted lower depression, however identifying as non-binary or a different gender identity was  
377 associated with higher self-reported anxiety and stress. Identifying as Aboriginal or Torres Strait Islander  
378 also predicted worse anxiety and stress levels. These groups may be particularly vulnerable during the  
379 current pandemic, and longitudinal research is needed to explore the longer term predictors of poorer mental  
380 health over time.

381 Our results confirm fears about the potential impact of the COVID-19 pandemic on people with lived  
382 experience of mental illness (7). Participants with a self-reported history of mental health problems were  
383 more afraid of COVID-19 and more worried about their loved ones contracting COVID-19, had higher  
384 distress, depression, anxiety, health anxiety and contamination fears, and higher rates of elevated health  
385 anxiety (26% versus 11%) than those without pre-existing mental health diagnoses. Relative to those  
386 without mental health issues, a greater proportion of people with self-reported mental health problems had  
387 elevated health anxiety (26% versus 11%), and said their mental health had been ‘a lot worse’ since the  
388 outbreak (26% versus 13%). Having a history of mental health issues was a consistent predictor of higher  
389 depression, anxiety and stress.

390 Because we did not collect any information about the history and nature of these mental health  
391 diagnoses, we cannot determine whether these individuals had higher distress prior to the pandemic, or  
392 whether distress increased as a result of the pandemic, due to inability to access usual supports, social  
393 isolation or loneliness (7). However, our findings highlight the need for proactive mental health

394 interventions for those who are experiencing elevated symptoms of depression, anxiety and stress during the  
395 current COVID-19 pandemic, regardless of whether the distress is an exacerbation or recurrence of pre-  
396 existing mental health concerns, or new onset. Digital interventions, which have been shown to be highly  
397 effective and cost-effective for depression and anxiety treatment (33) will be crucial to respond to these  
398 ongoing mental health concerns, as they have capacity to deliver high quality interventions for distress at  
399 scale, and to those in social isolation who are unable to attend face-to-face services (7, 34).

400 This study provides new knowledge about the rates of health anxiety during the COVID-19  
401 pandemic. Over one in four (26%) of people with a prior history of mental health issues, and 11% of those  
402 without pre-existing mental health issues reported elevated health anxiety in the past week, which is higher  
403 than rates of health anxiety in the general Australian population (3.4% (35)), and closer to the rates of health  
404 anxiety observed in general practice (10%) and outpatient medical clinic settings (20-25%) (36). While these  
405 symptoms are not necessarily indicative of illness anxiety disorder, high health anxiety is likely to have  
406 significant ramifications for health service utilisation. Responses to health anxiety vary substantially, with  
407 responses ranging from a complete avoidance of doctors, hospitals, and medical settings due to fear, to the  
408 other end of the spectrum of excessive, repeated, and unnecessary health service use, diagnostic testing,  
409 emergency visits and paramedic calls (37). Proactive treatment of health anxiety with digital interventions  
410 may also be needed should these symptoms persist (38, 39).

411 In prior research, risk perceptions, including the perceived risk of contracting the virus, perceived  
412 control over the virus, and the perceived seriousness of the symptoms have been shown to be associated with  
413 psychological distress, and behavioural responses to disease outbreaks. Consistent with the findings of  
414 SARS pandemics, and our previous study, we found moderate perceptions of risk of contracting the virus.  
415 Participants rated on average that there was a 50% likelihood of contracting the virus personally, and higher  
416 perceived risk was associate with higher depression and stress levels. In the current cohort approximately  
417 one third of participants expected COVID-19 to lead to severe symptoms (32.1%), and in some cases death  
418 (4%), which is higher than in our previous study, where we found only 25% expected severe symptoms. The  
419 expected severity of the COVID-19 illness differs markedly to the reality for most people, as studies show  
420 that 80% of people will experience no or mild symptoms (40). These findings reinforce the need for



421 education campaigns to address these misperceptions, especially as research has shown that these beliefs are  
422 associated with engagement with distress. These risk perceptions explained a relatively small amount of  
423 variance in the regression analyses, with perceived control over COVID-19 a consistent predictor of better  
424 mental health and higher perceived severity of illness associated with higher depression and anxiety.  
425 However, it is important to note that other predictors, including loneliness, financial stress, uncertainty,  
426 demographic factors, and prior history of mental and chronic illness were stronger predictors of distress.

427  
428         Similar to Wang et al. (8), some of the most common precautionary behaviours were avoiding  
429 touching objects that had been touched by others, washing hands, and using hand sanitiser. Participants also  
430 commonly reported staying at home and avoiding social events and socialising with others outside of the  
431 household. In contrast to media portrayals of panic buying, excessive purchasing behaviour was not  
432 common. In previous research, higher engagement in hygiene behaviours, such as handwashing have been  
433 associated with lower distress and anxiety, suggesting behavioural control may be protective for mental  
434 health. However, in the current cohort we found some inconsistent results, with engagement in *more* hygiene  
435 behaviours associated with *higher* anxiety and stress levels (they were not associated with depression).  
436 These findings differ to the findings of Wang et al. (8) during the early stages of the epidemic in China,  
437 where the use of precautionary measures, such as avoiding sharing utensils, hand hygiene and wearing  
438 masks were associated with lower stress, anxiety and depression. However, the current findings are  
439 consistent with some research from the SARS epidemic, in which moderate levels of anxiety were  
440 associated with higher uptake of precautionary behaviours (41). It is possible that the association we found  
441 was due to people who were higher in anxiety or stress using these behaviours in an attempt to control  
442 anxiety.

443         Finally, concerns have been raised about the potential impact of social isolation and quarantine on  
444 physical inactivity, as well as increased alcohol use and abuse. On the AUDIT-C brief screener for alcohol  
445 use, approximately 52.7% met criteria for hazardous drinking levels, which is higher than the 42% found in  
446 primary care samples in Australia (42) and higher than USA-based population samples (35 %-45%) (43).  
447 However it is important to note that participants with a prior experience of mental health problems had  
448 lower rates of hazardous drinking, and lower rates of inactivity. In the current sample, 42.7% met the

449 national physical activity recommendations of 150 minutes or more of moderate to vigorous activity over  
450 the past week, which are similar to the population based normative data from the Australian National Health  
451 survey (43-44%) (32). We will be following up these participants longitudinally to explore whether activity  
452 levels decrease further as isolation restrictions proceed. Given the importance of exercise and physical  
453 activity in maintaining mental health and promoting overall health and wellbeing, interventions could be  
454 used to assist increasing activity levels for those sedentary at home.

### 455 **Limitations**

456 The results are based on a convenience sample recruited online, who were mostly women (85%) and  
457 well educated, and a significant proportion reported having lived experience of a mental health diagnosis  
458 (70%). This may overestimate the symptom severity and impact of COVID-19, especially given past studies  
459 have shown worse impact of pandemics on those with pre-existing mental illness, and in females. It may  
460 also mean that the results cannot generalise to the broader Australian population. Results are also based  
461 solely on validated self-report measures, due to their ease and speed of assessment, and administration.  
462 Conducting diagnostic interviews to assess mental health diagnoses with more than 5000 participants in 10  
463 days would not have been feasible. Future studies need to explore the impact of COVID-19 on mental health  
464 of COVID-19 patients, given evidence of increased rates of Post -Traumatic Stress Disorder, sleep  
465 disturbance and depression in SARS patients (5, 44). Finally, the study was cross-sectional; the next step in  
466 our research is to track this cohort over time, to explore how their mental health changes as the pandemic  
467 evolves in Australia.

### 468 469 **Acknowledgements**

470 We thank all of the participants who kindly contributed to this study.

## References

1. World Health Organisation. Coronavirus disease 2019 (COVID-19) Situation Report – 85 2020  
[Available from: [https://www.who.int/docs/default-source/coronaviruse/situation-reports/20200414-sitrep-85-covid-19.pdf?sfvrsn=7b8629bb\\_2](https://www.who.int/docs/default-source/coronaviruse/situation-reports/20200414-sitrep-85-covid-19.pdf?sfvrsn=7b8629bb_2).
2. Harvey SB, Strudwick J, Petrie K, Gayed A, Santkar S, Counson I, et al. Expected impact of COVID-19 on the mental health of health professionals. A systematic review and meta-analysis of studies from the current and previous pandemics. under review.
3. Chua SE, Cheung V, McAlonan GM, Cheung C, Wong JW, Cheung EP, et al. Stress and psychological impact on SARS patients during the outbreak. Canadian journal of psychiatry Revue canadienne de psychiatrie. 2004;49(6):385-90.
4. Chua SE, Cheung V, Cheung C, McAlonan GM, Wong JW, Cheung EP, et al. Psychological effects of the SARS outbreak in Hong Kong on high-risk health care workers. Canadian journal of psychiatry Revue canadienne de psychiatrie. 2004;49(6):391-3.
5. Mak IWC, Chu CM, Pan PC, Yiu MGC, Chan VL. Long-term psychiatric morbidities among SARS survivors. General Hospital Psychiatry. 2009;31(4):318-26.
6. Phua DH, Tang HK, Tham KY. Coping responses of emergency physicians and nurses to the 2003 severe acute respiratory syndrome outbreak. Academic emergency medicine : official journal of the Society for Academic Emergency Medicine. 2005;12(4):322-8.
7. Holmes EA, O'Connor RC, Perry VH, Tracey I, Wessely S, Arseneault L, et al. Multidisciplinary research priorities for the COVID-19 pandemic: a call for action for mental health science. The Lancet Psychiatry.
8. Wang C, Pan R, Wan X, Tan Y, Xu L, Ho CS, et al. Immediate Psychological Responses and Associated Factors during the Initial Stage of the 2019 Coronavirus Disease (COVID-19) Epidemic among the General Population in China. International journal of environmental research and public health. 2020;17(5).

- 496 9. Zhang Y, Ma ZF. Impact of the COVID-19 Pandemic on Mental Health and Quality of Life among  
497 Local Residents in Liaoning Province, China: A Cross-Sectional Study. *International journal of*  
498 *environmental research and public health*. 2020;17:2381.
- 499 10. Qiu J, Shen B, Zhao M, Wang Z, Xie B, Xu Y. A nationwide survey of psychological distress among  
500 Chinese people in the COVID-19 epidemic: implications and policy recommendations. *General Psychiatry*.  
501 2020;33(2):e100213.
- 502 11. Lai J, Ma S, Wang Y, Cai Z, Hu J, Wei N, et al. Factors Associated With Mental Health Outcomes  
503 Among Health Care Workers Exposed to Coronavirus Disease 2019. *JAMA Network Open*.  
504 2020;3(3):e203976-e.
- 505 12. Wang C, Pan R, Wan X, Tan Y, Xu L, McIntyre RS, et al. A longitudinal study on the mental health  
506 of general population during the COVID-19 epidemic in China. *Brain, behavior, and immunity*. 2020.
- 507 13. Huang Y, Zhao N. Generalized anxiety disorder, depressive symptoms and sleep quality during  
508 COVID-19 epidemic in China: a web-based cross-sectional survey. *medRxiv*. 2020:2020.02.19.20025395.
- 509 14. Faasse K, Newby JM. Public perceptions of COVID-19 in Australia: perceived risk, knowledge,  
510 health-protective behaviours, and vaccine intentions. *medRxiv*. 2020.04.25.20079996.
- 511 15. Blakey SM, Abramowitz JS. Psychological Predictors of Health Anxiety in Response to the Zika  
512 Virus. *J Clin Psychol Med Settings*. 2017;24(3-4):270-8.
- 513 16. Wheaton MG, Abramowitz JS, Berman NC, Fabricant LE, Olatunji BO. Psychological predictors of  
514 anxiety in response to the H1N1 (swine flu) pandemic. *Cognitive Therapy and Research*. 2012;36(3):210-8.
- 515 17. Asmundson GJG, Taylor S. Coronaphobia: Fear and the 2019-nCoV outbreak. *Journal of anxiety*  
516 *disorders*. 2020;70:102196.
- 517 18. Asmundson GJG, Taylor S. How health anxiety influences responses to viral outbreaks like COVID-  
518 19: What all decision-makers, health authorities, and health care professionals need to know. *Journal of*  
519 *anxiety disorders*. 2020;71:102211.
- 520 19. Beutel ME, Klein EM, Brähler E, Reiner I, Jünger C, Michal M, et al. Loneliness in the general  
521 population: prevalence, determinants and relations to mental health. *BMC Psychiatry*. 2017;17(1):97.

- 522 20. Cacioppo JT, Hughes ME, Waite LJ, Hawkley LC, Thisted RA. Loneliness as a specific risk factor  
523 for depressive symptoms: cross-sectional and longitudinal analyses. *Psychology and aging*. 2006;21(1):140-  
524 51.
- 525 21. Glonti K, Gordeev VS, Goryakin Y, Reeves A, Stuckler D, McKee M, et al. A systematic review on  
526 health resilience to economic crises. *PloS one*. 2015;10(4):e0123117.
- 527 22. Lovibond SH, Lovibond PF. *Manual for the Depression Anxiety Stress Scales*. 2nd ed. Sydney:  
528 Psychology Foundation; 1995.
- 529 23. Asmundson GJR, Carleton NR, Bovell CV, Taylor S. Comparison of unitary and multidimensional  
530 models of the Whiteley Index in a nonclinical sample: implications for understanding and assessing health  
531 anxiety. *Journal of Cognitive Psychotherapy*. 2008;22(2):87-96.
- 532 24. Burns GL, Keortge SG, Formea GM, Sternberger LG. Revision of the Padua Inventory of obsessive  
533 compulsive disorder symptoms: Distinctions between worry, obsessions, and compulsions. *Behaviour*  
534 *Research and Therapy*. 1996;34(2):163-73.
- 535 25. Bults M, Beaujean DJ, de Zwart O, Kok G, van Empelen P, van Steenbergen JE, et al. Perceived  
536 risk, anxiety, and behavioural responses of the general public during the early phase of the Influenza A  
537 (H1N1) pandemic in the Netherlands: results of three consecutive online surveys. *BMC public health*.  
538 2011;11:2.
- 539 26. Bults M, Beaujean DJ, Richardus JH, Voeten HA. Perceptions and behavioral responses of the  
540 general public during the 2009 influenza A (H1N1) pandemic: a systematic review. *Disaster medicine and*  
541 *public health preparedness*. 2015;9(2):207-19.
- 542 27. Greenwood JJJ, Joy EA, Stanford J. The physical activity vital sign: a primary care tool to guide  
543 counseling for obesity. *Journal of Physical Activity and Health*. 2010;7(5):571-6.
- 544 28. Bush K, Kivlahan DR, McDonell MB, Fihn SD, Bradley KA. The AUDIT alcohol consumption  
545 questions (AUDIT-C): an effective brief screening test for problem drinking. *Archives of Internal Medicine*.  
546 1998;158(16):1789-95.

- 547 29. Bradley KA, DeBenedetti AF, Volk RJ, Williams EC, Frank D, Kivlahan DR. AUDIT-C as a brief  
548 screen for alcohol misuse in primary care. *Alcoholism, clinical and experimental research*. 2007;31(7):1208-  
549 17.
- 550 30. Barr B, Taylor-Robinson D, Scott-Samuel A, McKee M, Stuckler D. Suicides associated with the  
551 2008-10 economic recession in England: time trend analysis. *BMJ : British Medical Journal*.  
552 2012;345:e5142.
- 553 31. Crawford JR, Henry JD. The Depression Anxiety Stress Scales (DASS): normative data and latent  
554 structure in a large non-clinical sample. *The British journal of clinical psychology*. 2003;42(Pt 2):111-31.
- 555 32. Australian Bureau of Statistics. *National Health Survey: First Results, 2014-15*. Canberra; 2014.
- 556 33. Andrews G, Basu A, Cuijpers P, Craske MG, McEvoy P, English CL, et al. Computer therapy for the  
557 anxiety and depression disorders is effective, acceptable and practical health care: An updated meta-  
558 analysis. *Journal of anxiety disorders*. 2018;55:70-8.
- 559 34. Wind TR, Rijkeboer M, Andersson G, Riper H. The COVID-19 pandemic: The 'black swan' for  
560 mental health care and a turning point for e-health. *Internet interventions*. 2020;20:100317-.
- 561 35. Sunderland M, Newby JM, Andrews G. Health anxiety in Australia: prevalence, comorbidity,  
562 disability and service use. *Br J Psychiatry*. 2013;202(1):56-61.
- 563 36. Tyrer P, Cooper S, Crawford M, Dupont S, Green J, Murphy D, et al. Prevalence of health anxiety  
564 problems in medical clinics. *Journal of Psychosomatic Research*. 2011;71(6):392-4.
- 565 37. American Psychiatric A. *Diagnostic and statistical manual of mental disorders : DSM-5*. Arlington,  
566 VA: American Psychiatric Association; 2013.
- 567 38. Newby JM, Smith J, Uppal S, Mason E, Mahoney AEJ, Andrews G. Internet-based cognitive  
568 behavioral therapy versus psychoeducation control for illness anxiety disorder and somatic symptom  
569 disorder: A randomized controlled trial. US: American Psychological Association; 2018. p. 89-98.
- 570 39. Hedman E, Axelsson E, Andersson E, Lekander M, Ljotsson B. Exposure-based cognitive-  
571 behavioural therapy via the internet and as bibliotherapy for somatic symptom disorder and illness anxiety  
572 disorder: randomised controlled trial. *The British journal of psychiatry : the journal of mental science*.  
573 2016;209(5):407-13.

- 574 40. Wu Z, McGoogan JM. Characteristics of and Important Lessons From the Coronavirus Disease 2019  
575 (COVID-19) Outbreak in China: Summary of a Report of 72 314 Cases From the Chinese Center for  
576 Disease Control and Prevention. *JAMA*. 2020;323(13):1239-42.
- 577 41. Leung GM, Lam TH, Ho LM, Ho SY, Chan BH, Wong IO, et al. The impact of community  
578 psychological responses on outbreak control for severe acute respiratory syndrome in Hong Kong. *Journal*  
579 *of epidemiology and community health*. 2003;57(11):857-63.
- 580 42. Hobden B, Bryant J, Sanson-Fisher R, Oldmeadow C, Carey M. Do rates of depression vary by level  
581 of alcohol misuse in Australian general practice? *J Australian Journal of Primary Health*. 2017;23(3):263-  
582 7.
- 583 43. Delaney KE, Lee AK, Lapham GT, Rubinsky AD, Chavez LJ, Bradley KA. Inconsistencies between  
584 alcohol screening results based on AUDIT-C scores and reported drinking on the AUDIT-C questions:  
585 prevalence in two US national samples. *Addiction Science & Clinical Practice*. 2014;9(1):2.
- 586 44. Moldofsky H, Patcai J. Chronic widespread musculoskeletal pain, fatigue, depression and disordered  
587 sleep in chronic post-SARS syndrome; a case-controlled study. *BMC neurology*. 2011;11:37.
- 588

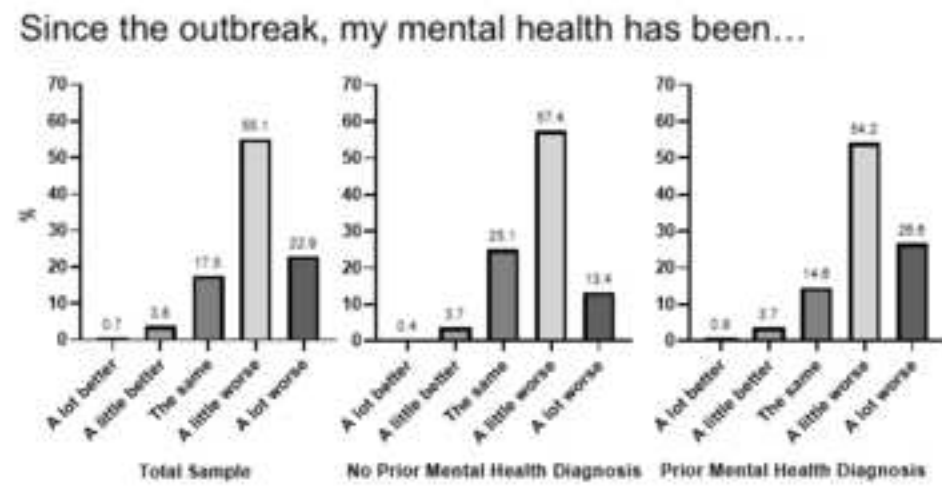



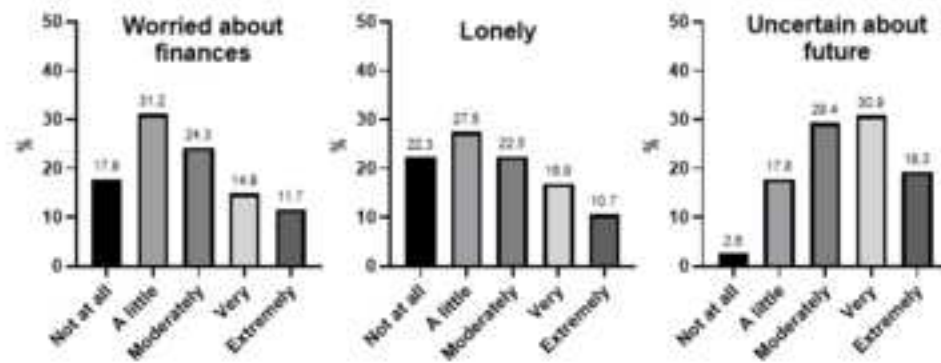

Supplement: S4 (10.1371/journal.pone.0236562.s004) [file journal.pone.0236562.s004]
